# Supplementary material
Source: MDPI journal article supplement (https://www.mdpi.com/2073-4344/12/7/784)
Supplement: s1 [file s1]

# Cloning of cold-adapted dextranase and preparation of high degree polymerization isomaltooligosaccharide

Huanyu Wang <sup>1,2</sup>, Qianru Lin <sup>1,2</sup>, Dongxue Dong <sup>1,2</sup>, Yingying Xu <sup>1,2</sup>, Mingwang Liu <sup>1,2</sup>, Jing Lu <sup>1,2,\*</sup>, Mingsheng Lyu <sup>1,2</sup>, and Shujun Wang <sup>1,2,\*</sup>

<sup>1</sup>Jiangsu Key Laboratory of Marine Bioresources and Environment/Jiangsu Key Laboratory of Marine Biotechnology, Jiangsu Ocean University, Lianyungang 222005, China

<sup>2</sup>Co-Innovation Center of Jiangsu Marine Bio-industry Technology, Jiangsu Ocean University, Lianyungang 222005, China

**\*Corresponding author.** Jing Lu and Shujun Wang, Jiangsu. Key Laboratory of Marine Bioresources and Environment, Jiangsu Ocean University, Lianyungang, 222005, PR China.

**E-mail addresses:** sjwang@jou.edu.cn ( S. Wang)

**Table S1.** Analysis of different components in commercial isomaltose.

|               | G     | IMO2   | IMO3   | IMO4   | IMO5   | Impurities |
|---------------|-------|--------|--------|--------|--------|------------|
| CIMO-Zhejiang | 9.11% | 20.12% | 19.53% | 9.97%  | 12.15% | 27.38%     |
| CIMO-Shandong | 5.32% | 25.75% | 25.72% | 13.11% | 11.68% | 16.39%     |

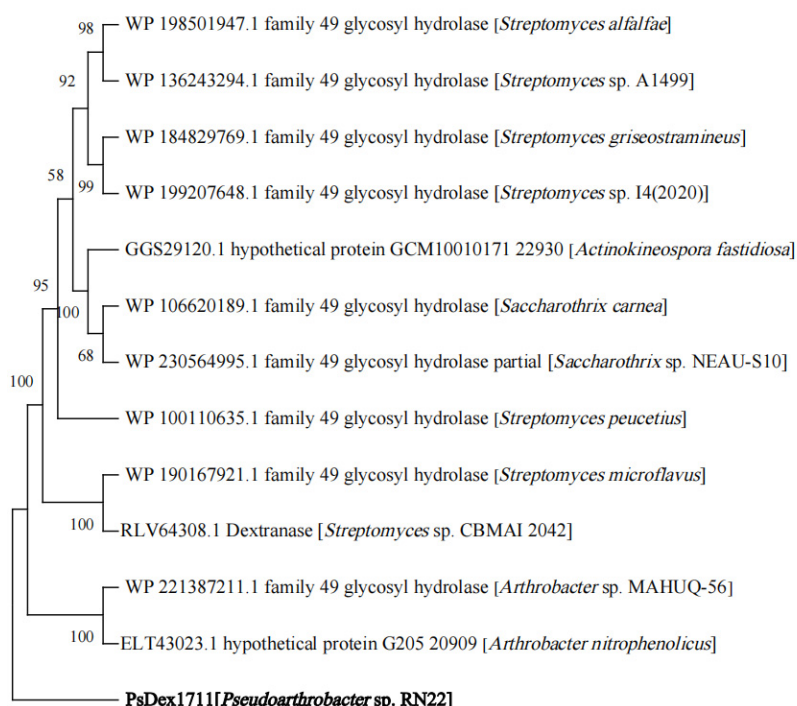

**Figure S1.** Evolutionary tree analysis of PsDex1711.

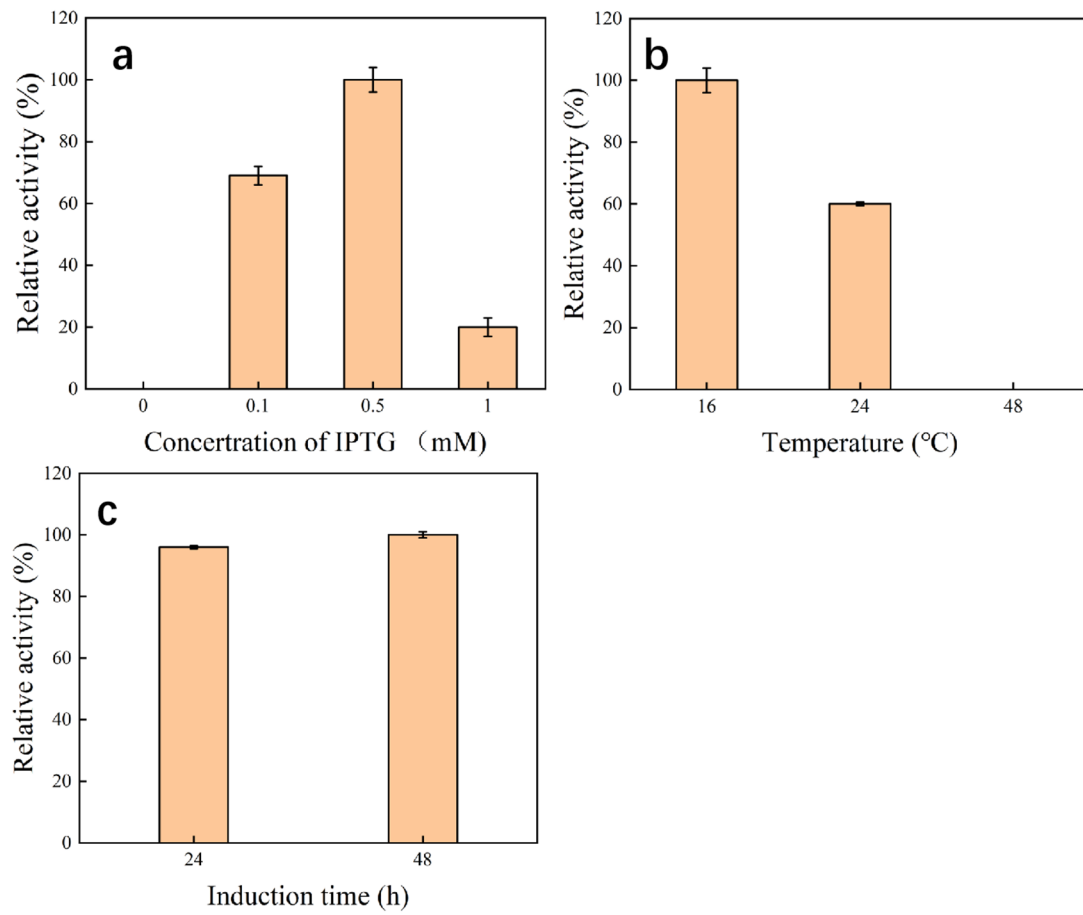

**Figure S2.** Expression conditions of PsDex1711. (a) The effect of IPTG concentration on PsDex1711 expression; (b) The effect of temperature on PsDex1711 expression; (c) The effect of time on PsDex1711 expression.
